# Supplementary material for: Evaluating an In-House Cell-Based Assay for Detecting Antibodies Against Muscle-Specific Tyrosine Kinase in Myasthenia Gravis
Source: PubMed Central journal article supplement — J Clin Neurol. 2021 May 7;17(3):400–8. doi: 10.3988/jcn.2021.17.3.400 (PMC8242307; doi:10.3988/jcn.2021.17.3.400), 2021-05-07
Supplement: jcn-17-400-s001.pdf [file jcn-17-400-s001.pdf]

**Supplementary Table 1.** Overall results of MuSK CBAs in patients with MG, other neuromuscular disorders, and healthy controls

| Known diagnosis               | Number of samples | Positive MuSK CBA | Percentage (%) |
|-------------------------------|-------------------|-------------------|----------------|
| MG                            | 177               | 34                | 19.2           |
| LEMS                          | 8                 | 0                 | 0              |
| CIDP                          | 17                | 0                 | 0              |
| Amyotrophic lateral sclerosis | 3                 | 0                 | 0              |
| Inflammatory myopathy         | 3                 | 0                 | 0              |
| Healthy control               | 10                | 0                 | 0              |

CBA: cell-based assay, CIDP: chronic inflammatory demyelinating polyradiculoneuropathy, LEMS: Lambert-Eaton myasthenic syndrome, MG: myasthenia gravis, MuSK: Muscle-specific tyrosine kinase
