# Supplementary material for: Evaluating an In-House Cell-Based Assay for Detecting Antibodies Against Muscle-Specific Tyrosine Kinase in Myasthenia Gravis
Source: PubMed Central journal article supplement — J Clin Neurol. 2021 May 7;17(3):400–8. doi: 10.3988/jcn.2021.17.3.400 (PMC8242307; doi:10.3988/jcn.2021.17.3.400), 2021-05-07
Supplement: jcn-17-400-s002.pdf [file jcn-17-400-s002.pdf]

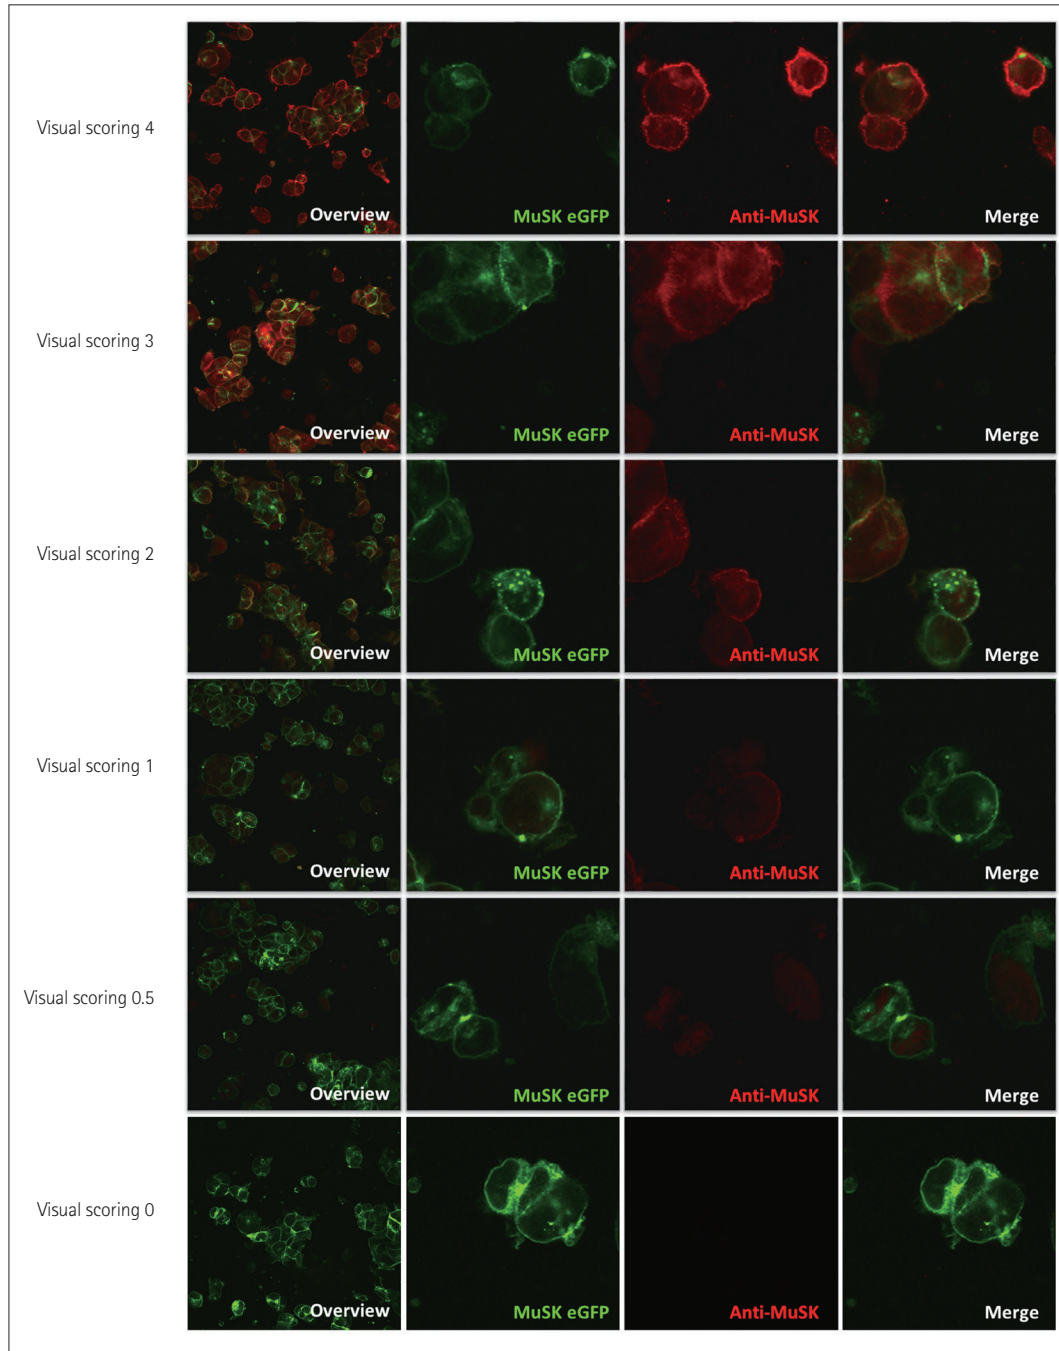

**Supplementary Fig. 1.** The representative images of the CBA in each level of visual scores. Anti-human IgG antibody binding (red fluorescence) is observed along the cell surface which co-localizes with MuSK-GFP expressed on the surface of HEK293 cells (green fluorescence). CBA: cell-based assay, HEK293: human embryonic kidney 293, MuSK-GFP: muscle-specific tyrosine kinase fused to green fluorescent protein
